# Supplementary material for: Physico-Chemical and Rheological Trait-Based Identification of Indian Wheat Varieties Suitable for Different End-Uses
Source: MDPI journal article supplement (doi:10.3390/foods13071125), 2024-04-08
Supplement: s1 [file s1]

**Table S1.** Composition of the identified high molecular weight gluten subunits by SDS-PAGE in the studied wheat cultivars (\*, It's name of HMW-GS protein band).

| Code name | Variety      | Glu-A1 | Glu-B1 | Glu-D1            | Glu- 1 Score | Code name | Variety         | Glu-A1 | Glu-B1 | Glu-D1 | Glu- 1 Score |
|-----------|--------------|--------|--------|-------------------|--------------|-----------|-----------------|--------|--------|--------|--------------|
| G-1       | Annuello     | 1      | 7+8    | 2+12              | 8            | G-34      | HP 1761         | 2*     | 17+18  | 2+12   | 8            |
| G-2       | Barham       | 1      | 7+9    | 2+12              | 7            | G-35      | HPW 311         | 2*     | 7      | 5+10   | 8            |
| G-3       | Baxter       | 1      | 13+16  | 2+12              | 8            | G-36      | HPW 316         | 2*     | 6+8    | 2+12   | 6            |
| G-4       | Binnu        | 2*     | 17+18  | 2+12              | 8            | G-37      | HPW 89          | 2*     | 7+8    | 2+12   | 8            |
| G-5       | C 306        | 2*     | 20     | 2+12              | 6            | G-38      | HQW 2           | 1      | 7      | 5+10   | 8            |
| G-6       | Datatine     | null   | 13+16  | 2+12              | 6            | G-39      | HW 2004         | 2*     | 13+16  | 2+12   | 8            |
| G-7       | DBW 14       | 2*     | 7+8    | 2+12              | 8            | G-40      | HW 2045         | 2*     | 7+8    | 2+12   | 8            |
| G-8       | DBW 16       | 2*     | 7+8    | 2+12              | 8            | G-41      | JANZ            | 1      | 7+8    | 2+12   | 8            |
| G-9       | DBW 17       | 2*     | 7      | 5+10              | 8            | G-42      | K 307           | 2*     | 17+18  | 2+12   | 8            |
| G-10      | DBW 39       | 2*     | 13+16  | 5+10              | 10           | G-43      | Longreach Orion | 2*     | 7+8    | 2+12   | 8            |
| G-11      | DL 153-2     | null   | 17+18  | 5+10              | 8            | G-44      | NAPHAL          | null   | 7+8    | null   | 4            |
| G-12      | DL 788-2     | 2*     | 17+18  | 2+12              | 8            | G-45      | NI 5439         | null   | 7+9    | 2+12   | 5            |
| G-13      | DPW 621-50   | 2*     | 17+18  | 5+10              | 10           | G-46      | NW 1014         | 2*     | 7+9    | 2+12   | 7            |
| G-14      | Drysdale     | 1      | 17+18  | 5+10              | 10           | G-47      | NW 2036         | 1      | 7+9    | 5+10   | 9            |
| G-15      | Ega Jitaring | 2*     | 17+18  | 2+12              | 8            | G-48      | PBW 343         | 2*     | 7      | 5+10   | 8            |
| G-16      | Gladius      | 1      | 7+8    | 5+10              | 10           | G-49      | PBW 396         | 2*     | 7+9    | 5+10   | 9            |
| G-17      | HD 2329      | 2*     | 7+9    | 2+12              | 7            | G-50      | PBW 502         | 2*     | 7      | 5+10   | 8            |
| G-18      | HD 2643      | 1      | 7+9    | 2+12              | 7            | G-51      | PBW 550         | null   | 7+9    | 5+10   | 9            |
| G-19      | HD 2687      | 2*     | 7+9    | 2+12              | 7            | G-52      | PBW 590         | 2*     | 7+9/7  | 5+10   | 9            |
| G-20      | HD 2733      | null   | 7+9    | 5+10              | 7            | G-53      | QBP 12-10       | null   | 7+9    | 2+12   | 5            |
| G-21      | HD 2824      | 2*     | 7      | 5+10              | 8            | G-54      | QBP 12-11       | null   | 17+18  | 2+12   | 6            |
| G-22      | HD 2851      | 2*     | 17+18  | 5+10              | 10           | G-55      | QBP 12-8        | 2*     | 7+8    | 2+12   | 8            |
| G-23      | HD 2864      | 1      | 7+8    | 2+12              | 8            | G-56      | QBP 12-9        | 2*     | 13+16  | 5+10   | 10           |
| G-24      | HD 2888      | null   | 20     | 2+12 <sub>2</sub> | 4            | G-57      | QBP 13-10       | 2*     | 7      | 2+12   | 6            |
| G-25      | HD 2894      | 2*     | 7+9    | 2+12              | 7            | G-58      | QBP 13-11       | 2*     | 8      | 2+12   | 6            |
| G-26      | HD 2967      | 2*     | 17+18  | 5+10              | 10           | G-59      | QBP 13-13       | null   | 7+9    | 2+12   | 7            |
| G-27      | HD 2985      | 2*     | 17+18  | 5+10              | 10           | G-60      | QBP 13-14       | null   | 13+16  | 5+10   | 10           |
| G-28      | HD 2987      | 2*     | 7+8    | 5+10              | 10           | G-61      | RAJ 3765        | 2*     | 7+8    | 2+12   | 8            |
| G-29      | HD 3043      | 1      | 13+19  | 5+10              | 10           | G-62      | UP 2425         | 2*     | 7+9    | 2+12   | 7            |
| G-30      | HD 3059      | 2*     | 17+18  | 5+10              | 10           | G-63      | WH 1021         | 2*     | 7+8    | 2+12   | 8            |
| G-31      | HDR 77       | 2*     | 7+8    | 2+12              | 8            | G-64      | WH 1080         | 1      | 13+16  | 5+10   | 10           |
| G-32      | HI 977       | 2*     | 17+18  | 5+10              | 10           | G-65      | WL 711          | 2*     | 7+8    | 2+12   | 8            |
| G-33      | HP 1744      | 2*     | 7+9    | 2+12              | 7            |           |                 |        |        |        |              |

**Table S2.** Principal components analysis for rheological traits in wheat genotypes

| Contribution of the variables (%): |              |              |       |
|------------------------------------|--------------|--------------|-------|
|                                    | F1           | F2           | F3    |
| Glu- 1 Score                       | 5.56         | 0.11         | 6.62  |
| Hardness Index (HI)                | <b>10.61</b> | 0.38         | 20.53 |
| SDS-SV (Flour)                     | 0.35         | <b>18.29</b> | 14.45 |
| Protein (%)                        | 0.36         | <b>23.43</b> | 4.86  |
| Wet Gluten %                       | 2.44         | <b>21.91</b> | 8.73  |
| Dry Gluten %                       | 0.82         | <b>26.92</b> | 2.54  |
| GI                                 | <b>8.98</b>  | 0.76         | 16.86 |
| W.A. (14%)                         | <b>9.85</b>  | 2.58         | 22.00 |
| DDT (minutes)                      | <b>8.92</b>  | 0.05         | 0.24  |
| STAB (minutes)                     | <b>15.72</b> | 2.70         | 2.64  |
| DOS (FU)                           | <b>17.44</b> | 1.48         | 0.53  |
| FON (second)                       | <b>18.95</b> | 1.38         | 0.01  |

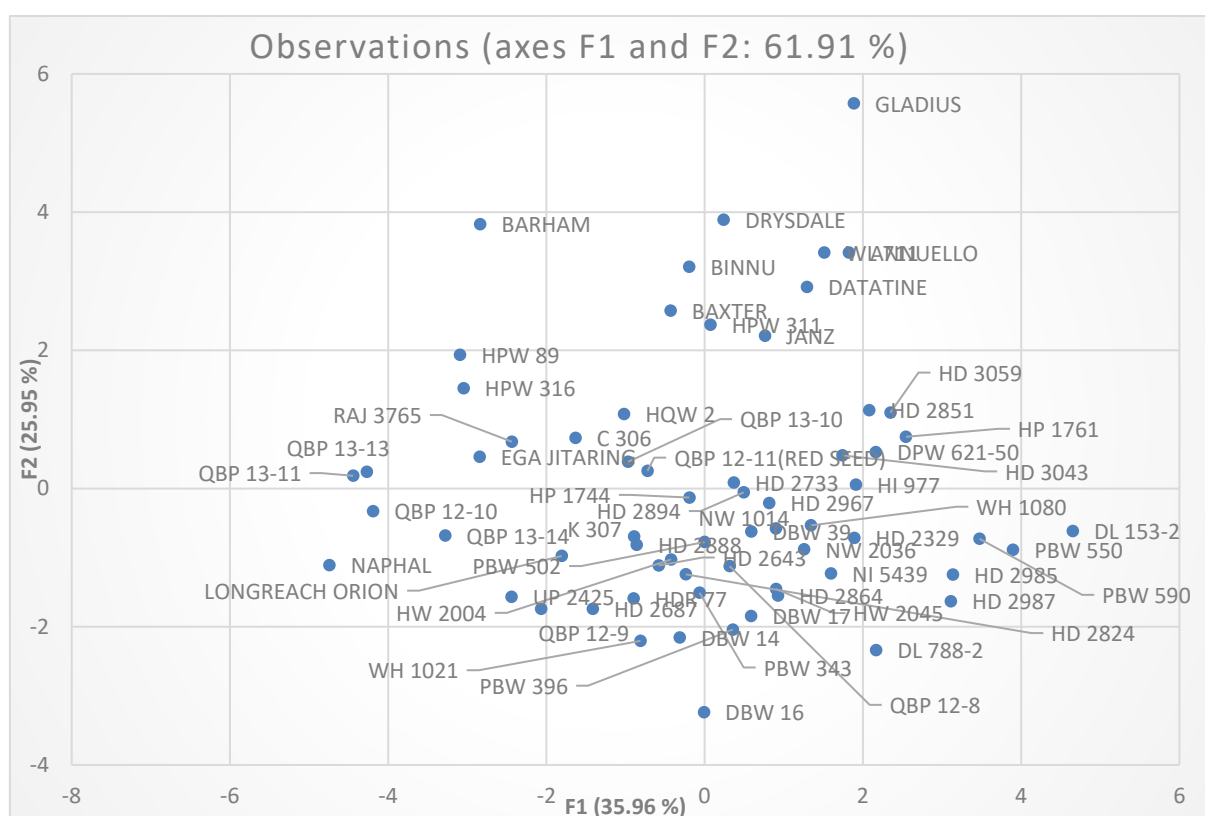

**Figure S1.** Principal component analysis (PCA) plot of, 55 Indian wheat genotypes and 10 Australian genotypes.

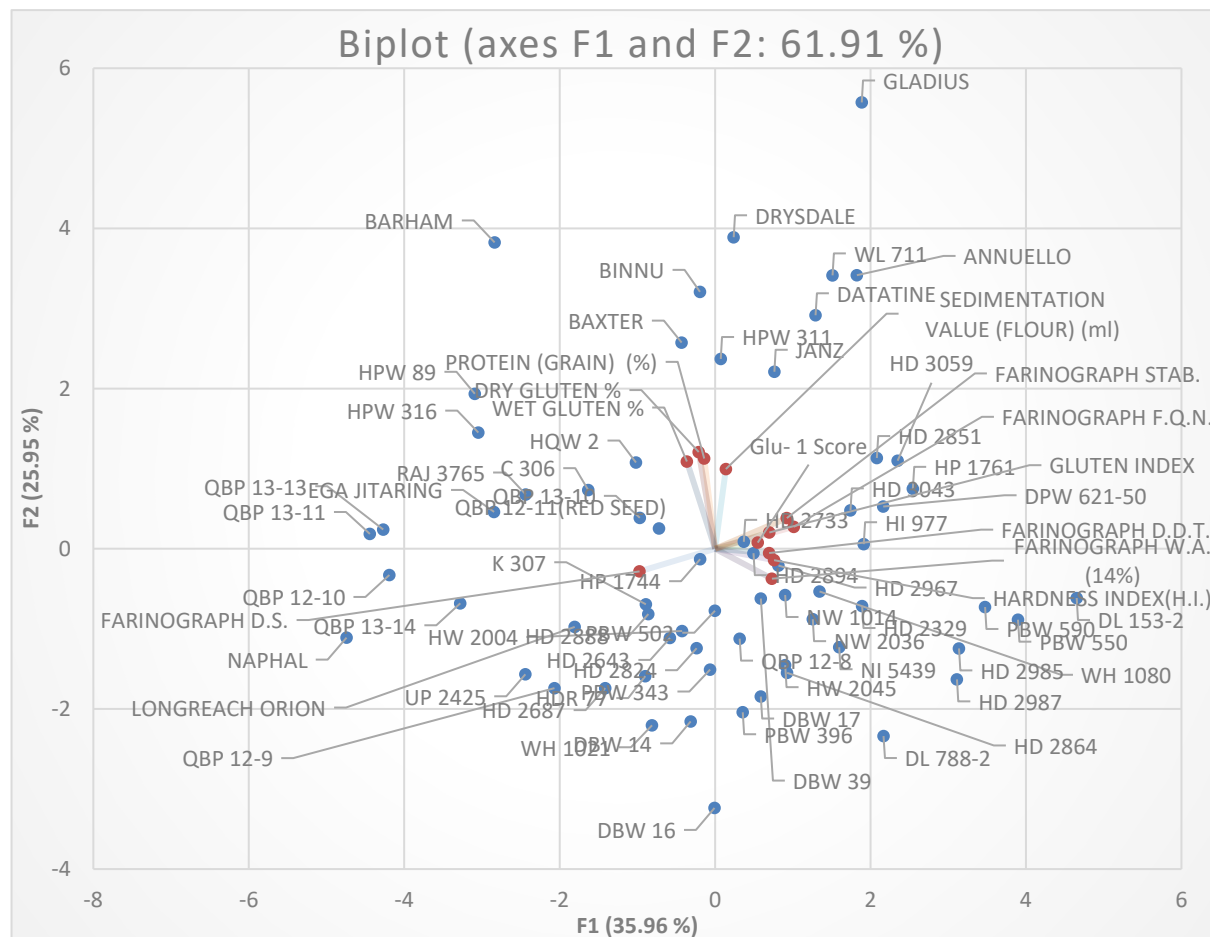

**Figure S2.** Principal component analysis (PCA) biplot of 65 studied wheat genotypes and the measured variables/traits length of arrows indicates the relative size of contribution of the trait.
